# Supplementary material
Source: MDPI journal article supplement (https://www.mdpi.com/2073-4433/15/3/292)
Supplement: s1 [file s1]

# Supplementary Materials: Oxygen Isotope Fractionation Due to Non-Thermal Escape of hot O from the Atmosphere of Mars

James R. Lyons

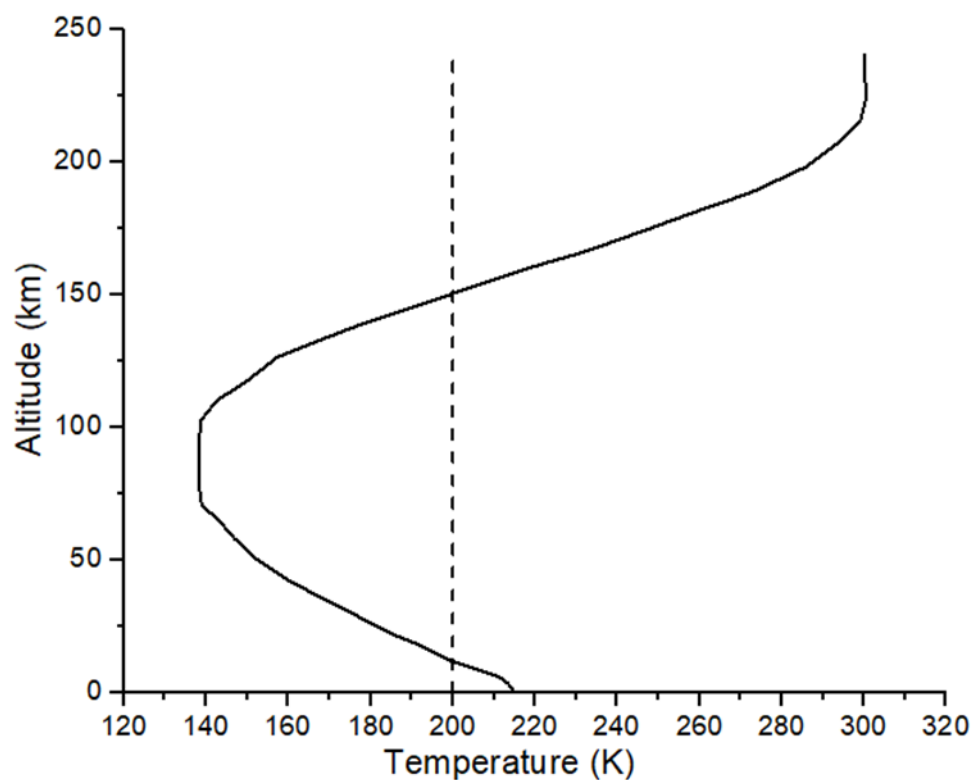

**Figure S1.** Temperature profile from Nair et al. [6] (solid) and for a 200 K isothermal profile (dashed).
